# Supplementary material for: Atmospheric Constraints on Landing Site Selection
Source: Springer Nature journal article supplement (doi:10.1038/ng1033), 2001-01-01
Supplement: ng1033-S3.pdf [file ng1033-S3.pdf]

Unadjusted Bonferroni-adjusted Permutation-adjusted

|                |                |                |
|----------------|----------------|----------------|
| 7.8094689e-006 | 2.9363603e-003 | 1.9000000e-003 |
| 1.6769144e-005 | 6.3051980e-003 | 3.7000000e-003 |
| 3.7393037e-005 | 1.4059782e-002 | 8.2000000e-003 |
| 1.1859381e-004 | 4.4591272e-002 | 2.2900000e-002 |
| 1.2675424e-004 | 4.7659593e-002 | 2.4200000e-002 |
| 1.2997885e-004 | 4.8872047e-002 | 2.4600000e-002 |
| 1.3177910e-004 | 4.9548942e-002 | 2.4800000e-002 |
| 2.2569191e-004 | 8.4860158e-002 | 3.9700000e-002 |
| 2.3324695e-004 | 8.7700853e-002 | 4.0600000e-002 |
| 2.6558371e-004 | 9.9859474e-002 | 4.5700000e-002 |
| 2.6606933e-004 | 1.0004207e-001 | 4.5700000e-002 |
| 3.6663349e-004 | 1.3785419e-001 | 6.0800000e-002 |
| 6.2737847e-004 | 2.3589430e-001 | 9.7900000e-002 |
| 6.4080229e-004 | 2.4094166e-001 | 9.9600000e-002 |
| 6.8479227e-004 | 2.5748189e-001 | 1.0510000e-001 |
| 9.5955881e-004 | 3.6079411e-001 | 1.3870000e-001 |
| 1.0874777e-003 | 4.0889161e-001 | 1.5290000e-001 |
| 1.2574228e-003 | 4.7279096e-001 | 1.7340000e-001 |
| 1.3055692e-003 | 4.9089400e-001 | 1.7810000e-001 |
| 1.4244745e-003 | 5.3560241e-001 | 1.9090000e-001 |
| 1.4423386e-003 | 5.4231932e-001 | 1.9190000e-001 |
| 1.8820229e-003 | 7.0764062e-001 | 2.3700000e-001 |
| 1.8925778e-003 | 7.1160927e-001 | 2.3810000e-001 |
| 2.3623974e-003 | 8.8826142e-001 | 2.8390000e-001 |
| 2.8083637e-003 | 1.0000000e+000 | 3.2490000e-001 |
| 3.1995798e-003 | 1.0000000e+000 | 3.5840000e-001 |
| 3.4024092e-003 | 1.0000000e+000 | 3.7420000e-001 |
| 3.4970221e-003 | 1.0000000e+000 | 3.8060000e-001 |
| 3.9652207e-003 | 1.0000000e+000 | 4.1480000e-001 |
| 3.9836353e-003 | 1.0000000e+000 | 4.1480000e-001 |
| 4.6830067e-003 | 1.0000000e+000 | 4.6040000e-001 |
| 6.4195926e-003 | 1.0000000e+000 | 5.6510000e-001 |

|                |                |                |
|----------------|----------------|----------------|
| 6.4550788e-003 | 1.0000000e+000 | 5.6700000e-001 |
| 6.4555986e-003 | 1.0000000e+000 | 5.6700000e-001 |
| 7.8295549e-003 | 1.0000000e+000 | 6.3430000e-001 |
| 9.3116366e-003 | 1.0000000e+000 | 6.9400000e-001 |
| 9.7798396e-003 | 1.0000000e+000 | 7.1000000e-001 |
| 1.0223954e-002 | 1.0000000e+000 | 7.2300000e-001 |
| 1.0775281e-002 | 1.0000000e+000 | 7.4050000e-001 |
| 1.1740376e-002 | 1.0000000e+000 | 7.6730000e-001 |
| 1.2305172e-002 | 1.0000000e+000 | 7.8110000e-001 |
| 1.3216993e-002 | 1.0000000e+000 | 8.0210000e-001 |
| 1.4986029e-002 | 1.0000000e+000 | 8.4170000e-001 |
| 1.5204169e-002 | 1.0000000e+000 | 8.4480000e-001 |
| 1.5736385e-002 | 1.0000000e+000 | 8.5220000e-001 |
| 1.6442665e-002 | 1.0000000e+000 | 8.6270000e-001 |
| 1.6655783e-002 | 1.0000000e+000 | 8.6570000e-001 |
| 2.0683931e-002 | 1.0000000e+000 | 9.1560000e-001 |
| 2.1946061e-002 | 1.0000000e+000 | 9.2700000e-001 |
| 2.2008276e-002 | 1.0000000e+000 | 9.2800000e-001 |
| 2.2348764e-002 | 1.0000000e+000 | 9.3020000e-001 |
| 2.3095191e-002 | 1.0000000e+000 | 9.3590000e-001 |
| 2.3145517e-002 | 1.0000000e+000 | 9.3650000e-001 |
| 2.3581855e-002 | 1.0000000e+000 | 9.3880000e-001 |
| 2.4097334e-002 | 1.0000000e+000 | 9.4200000e-001 |
| 2.5075040e-002 | 1.0000000e+000 | 9.4830000e-001 |
| 2.5864081e-002 | 1.0000000e+000 | 9.5300000e-001 |
| 2.6314002e-002 | 1.0000000e+000 | 9.5520000e-001 |
| 2.7322811e-002 | 1.0000000e+000 | 9.6100000e-001 |
| 2.7444130e-002 | 1.0000000e+000 | 9.6110000e-001 |
| 2.9106314e-002 | 1.0000000e+000 | 9.6760000e-001 |
| 3.1600378e-002 | 1.0000000e+000 | 9.7520000e-001 |
| 3.1793115e-002 | 1.0000000e+000 | 9.7520000e-001 |
| 3.3481825e-002 | 1.0000000e+000 | 9.8090000e-001 |
| 3.3767024e-002 | 1.0000000e+000 | 9.8150000e-001 |

|                |                |                |
|----------------|----------------|----------------|
| 3.4258858e-002 | 1.0000000e+000 | 9.8250000e-001 |
| 3.4411541e-002 | 1.0000000e+000 | 9.8290000e-001 |
| 3.4701400e-002 | 1.0000000e+000 | 9.8430000e-001 |
| 3.4983200e-002 | 1.0000000e+000 | 9.8480000e-001 |
| 3.5392403e-002 | 1.0000000e+000 | 9.8550000e-001 |
| 3.5838848e-002 | 1.0000000e+000 | 9.8610000e-001 |
| 3.6443604e-002 | 1.0000000e+000 | 9.8680000e-001 |
| 3.7247745e-002 | 1.0000000e+000 | 9.8810000e-001 |
| 3.8425022e-002 | 1.0000000e+000 | 9.8960000e-001 |
| 3.8459548e-002 | 1.0000000e+000 | 9.8970000e-001 |
| 3.8885536e-002 | 1.0000000e+000 | 9.9030000e-001 |
| 3.9173074e-002 | 1.0000000e+000 | 9.9050000e-001 |
| 3.9283702e-002 | 1.0000000e+000 | 9.9060000e-001 |
| 4.2670244e-002 | 1.0000000e+000 | 9.9350000e-001 |
| 4.3093064e-002 | 1.0000000e+000 | 9.9370000e-001 |
| 4.4467745e-002 | 1.0000000e+000 | 9.9450000e-001 |
| 4.4707726e-002 | 1.0000000e+000 | 9.9480000e-001 |
| 4.5642527e-002 | 1.0000000e+000 | 9.9550000e-001 |
| 4.5687230e-002 | 1.0000000e+000 | 9.9550000e-001 |
| 4.7229492e-002 | 1.0000000e+000 | 9.9610000e-001 |
| 4.7675238e-002 | 1.0000000e+000 | 9.9630000e-001 |
| 4.9502733e-002 | 1.0000000e+000 | 9.9700000e-001 |
| 5.1110561e-002 | 1.0000000e+000 | 9.9730000e-001 |
| 5.1950269e-002 | 1.0000000e+000 | 9.9750000e-001 |
| 5.5231410e-002 | 1.0000000e+000 | 9.9840000e-001 |
| 5.5526356e-002 | 1.0000000e+000 | 9.9850000e-001 |
| 5.5947116e-002 | 1.0000000e+000 | 9.9850000e-001 |
| 5.7009795e-002 | 1.0000000e+000 | 9.9870000e-001 |
| 5.7351469e-002 | 1.0000000e+000 | 9.9870000e-001 |
| 5.8259367e-002 | 1.0000000e+000 | 9.9880000e-001 |
| 5.9423307e-002 | 1.0000000e+000 | 9.9900000e-001 |
| 5.9704521e-002 | 1.0000000e+000 | 9.9900000e-001 |
| 6.1180688e-002 | 1.0000000e+000 | 9.9910000e-001 |

|                |                |                |
|----------------|----------------|----------------|
| 6.3362067e-002 | 1.0000000e+000 | 9.9930000e-001 |
| 6.4986843e-002 | 1.0000000e+000 | 9.9940000e-001 |
| 6.5242767e-002 | 1.0000000e+000 | 9.9940000e-001 |
| 6.5624787e-002 | 1.0000000e+000 | 9.9950000e-001 |
| 6.5717022e-002 | 1.0000000e+000 | 9.9950000e-001 |
| 6.6009184e-002 | 1.0000000e+000 | 9.9950000e-001 |
| 6.6787271e-002 | 1.0000000e+000 | 9.9950000e-001 |
| 6.6902573e-002 | 1.0000000e+000 | 9.9950000e-001 |
| 7.1350461e-002 | 1.0000000e+000 | 9.9980000e-001 |
| 7.1513446e-002 | 1.0000000e+000 | 9.9980000e-001 |
| 7.1826208e-002 | 1.0000000e+000 | 9.9980000e-001 |
| 7.2691753e-002 | 1.0000000e+000 | 9.9980000e-001 |
| 7.6366310e-002 | 1.0000000e+000 | 9.9990000e-001 |
| 7.7116908e-002 | 1.0000000e+000 | 9.9990000e-001 |
| 7.8481177e-002 | 1.0000000e+000 | 9.9990000e-001 |
| 7.9572468e-002 | 1.0000000e+000 | 9.9990000e-001 |
| 7.9729111e-002 | 1.0000000e+000 | 9.9990000e-001 |
| 8.0128771e-002 | 1.0000000e+000 | 9.9990000e-001 |
| 8.1144516e-002 | 1.0000000e+000 | 9.9990000e-001 |
| 8.1331688e-002 | 1.0000000e+000 | 9.9990000e-001 |
| 8.3720275e-002 | 1.0000000e+000 | 9.9990000e-001 |
| 8.3886475e-002 | 1.0000000e+000 | 9.9990000e-001 |
| 8.4039208e-002 | 1.0000000e+000 | 9.9990000e-001 |
| 8.6011407e-002 | 1.0000000e+000 | 1.0000000e+000 |
| 8.6470808e-002 | 1.0000000e+000 | 1.0000000e+000 |
| 8.6550833e-002 | 1.0000000e+000 | 1.0000000e+000 |
| 8.6693287e-002 | 1.0000000e+000 | 1.0000000e+000 |
| 8.6730703e-002 | 1.0000000e+000 | 1.0000000e+000 |
| 8.7371691e-002 | 1.0000000e+000 | 1.0000000e+000 |
| 8.8167813e-002 | 1.0000000e+000 | 1.0000000e+000 |
| 8.9580648e-002 | 1.0000000e+000 | 1.0000000e+000 |
| 9.0472538e-002 | 1.0000000e+000 | 1.0000000e+000 |
| 9.3927543e-002 | 1.0000000e+000 | 1.0000000e+000 |

|                |                |                |
|----------------|----------------|----------------|
| 9.4425708e-002 | 1.0000000e+000 | 1.0000000e+000 |
| 9.4833975e-002 | 1.0000000e+000 | 1.0000000e+000 |
| 9.6342911e-002 | 1.0000000e+000 | 1.0000000e+000 |
| 9.8120719e-002 | 1.0000000e+000 | 1.0000000e+000 |
| 9.8781227e-002 | 1.0000000e+000 | 1.0000000e+000 |
| 1.0012459e-001 | 1.0000000e+000 | 1.0000000e+000 |
| 1.0122534e-001 | 1.0000000e+000 | 1.0000000e+000 |
| 1.0393377e-001 | 1.0000000e+000 | 1.0000000e+000 |
| 1.0437611e-001 | 1.0000000e+000 | 1.0000000e+000 |
| 1.0578337e-001 | 1.0000000e+000 | 1.0000000e+000 |
| 1.0656771e-001 | 1.0000000e+000 | 1.0000000e+000 |
| 1.0832446e-001 | 1.0000000e+000 | 1.0000000e+000 |
| 1.0845440e-001 | 1.0000000e+000 | 1.0000000e+000 |
| 1.0911134e-001 | 1.0000000e+000 | 1.0000000e+000 |
| 1.0967163e-001 | 1.0000000e+000 | 1.0000000e+000 |
| 1.0984833e-001 | 1.0000000e+000 | 1.0000000e+000 |
| 1.1097991e-001 | 1.0000000e+000 | 1.0000000e+000 |
| 1.1135458e-001 | 1.0000000e+000 | 1.0000000e+000 |
| 1.1302525e-001 | 1.0000000e+000 | 1.0000000e+000 |
| 1.1342637e-001 | 1.0000000e+000 | 1.0000000e+000 |
| 1.1675437e-001 | 1.0000000e+000 | 1.0000000e+000 |
| 1.2303307e-001 | 1.0000000e+000 | 1.0000000e+000 |
| 1.2585526e-001 | 1.0000000e+000 | 1.0000000e+000 |
| 1.3061992e-001 | 1.0000000e+000 | 1.0000000e+000 |
| 1.3245248e-001 | 1.0000000e+000 | 1.0000000e+000 |
| 1.3569976e-001 | 1.0000000e+000 | 1.0000000e+000 |
| 1.3662880e-001 | 1.0000000e+000 | 1.0000000e+000 |
| 1.3807981e-001 | 1.0000000e+000 | 1.0000000e+000 |
| 1.3896262e-001 | 1.0000000e+000 | 1.0000000e+000 |
| 1.3911547e-001 | 1.0000000e+000 | 1.0000000e+000 |
| 1.4030013e-001 | 1.0000000e+000 | 1.0000000e+000 |
| 1.4081582e-001 | 1.0000000e+000 | 1.0000000e+000 |
| 1.4271359e-001 | 1.0000000e+000 | 1.0000000e+000 |

1.4939701e-001 1.0000000e+000 1.0000000e+000  
1.5369581e-001 1.0000000e+000 1.0000000e+000  
1.5409970e-001 1.0000000e+000 1.0000000e+000  
1.5454401e-001 1.0000000e+000 1.0000000e+000  
1.6069394e-001 1.0000000e+000 1.0000000e+000  
1.6264210e-001 1.0000000e+000 1.0000000e+000  
1.6268277e-001 1.0000000e+000 1.0000000e+000  
1.6287163e-001 1.0000000e+000 1.0000000e+000  
1.6558303e-001 1.0000000e+000 1.0000000e+000  
1.6614794e-001 1.0000000e+000 1.0000000e+000  
1.6746424e-001 1.0000000e+000 1.0000000e+000  
1.6788645e-001 1.0000000e+000 1.0000000e+000  
1.6977846e-001 1.0000000e+000 1.0000000e+000  
1.7330756e-001 1.0000000e+000 1.0000000e+000  
1.7742698e-001 1.0000000e+000 1.0000000e+000  
1.8048727e-001 1.0000000e+000 1.0000000e+000  
1.8430722e-001 1.0000000e+000 1.0000000e+000  
1.8432027e-001 1.0000000e+000 1.0000000e+000  
1.8659985e-001 1.0000000e+000 1.0000000e+000  
1.8908340e-001 1.0000000e+000 1.0000000e+000  
1.9337134e-001 1.0000000e+000 1.0000000e+000  
1.9419268e-001 1.0000000e+000 1.0000000e+000  
1.9871111e-001 1.0000000e+000 1.0000000e+000  
1.9980625e-001 1.0000000e+000 1.0000000e+000  
2.0342942e-001 1.0000000e+000 1.0000000e+000  
2.0725147e-001 1.0000000e+000 1.0000000e+000  
2.0729099e-001 1.0000000e+000 1.0000000e+000  
2.1066429e-001 1.0000000e+000 1.0000000e+000  
2.1389150e-001 1.0000000e+000 1.0000000e+000  
2.1785846e-001 1.0000000e+000 1.0000000e+000  
2.1800101e-001 1.0000000e+000 1.0000000e+000  
2.1971438e-001 1.0000000e+000 1.0000000e+000  
2.2325921e-001 1.0000000e+000 1.0000000e+000

2.2415919e-001 1.0000000e+000 1.0000000e+000  
2.2587070e-001 1.0000000e+000 1.0000000e+000  
2.2830313e-001 1.0000000e+000 1.0000000e+000  
2.2965457e-001 1.0000000e+000 1.0000000e+000  
2.3019558e-001 1.0000000e+000 1.0000000e+000  
2.3455525e-001 1.0000000e+000 1.0000000e+000  
2.3570186e-001 1.0000000e+000 1.0000000e+000  
2.3645801e-001 1.0000000e+000 1.0000000e+000  
2.4006075e-001 1.0000000e+000 1.0000000e+000  
2.4106463e-001 1.0000000e+000 1.0000000e+000  
2.4254098e-001 1.0000000e+000 1.0000000e+000  
2.4492720e-001 1.0000000e+000 1.0000000e+000  
2.4696916e-001 1.0000000e+000 1.0000000e+000  
2.4924937e-001 1.0000000e+000 1.0000000e+000  
2.5031339e-001 1.0000000e+000 1.0000000e+000  
2.5485400e-001 1.0000000e+000 1.0000000e+000  
2.5538807e-001 1.0000000e+000 1.0000000e+000  
2.5706608e-001 1.0000000e+000 1.0000000e+000  
2.5788480e-001 1.0000000e+000 1.0000000e+000  
2.5845047e-001 1.0000000e+000 1.0000000e+000  
2.6213649e-001 1.0000000e+000 1.0000000e+000  
2.6450831e-001 1.0000000e+000 1.0000000e+000  
2.6758747e-001 1.0000000e+000 1.0000000e+000  
2.7098842e-001 1.0000000e+000 1.0000000e+000  
2.7361777e-001 1.0000000e+000 1.0000000e+000  
2.7423848e-001 1.0000000e+000 1.0000000e+000  
2.7911486e-001 1.0000000e+000 1.0000000e+000  
2.9630205e-001 1.0000000e+000 1.0000000e+000  
2.9761394e-001 1.0000000e+000 1.0000000e+000  
2.9815177e-001 1.0000000e+000 1.0000000e+000  
3.0278900e-001 1.0000000e+000 1.0000000e+000  
3.0465473e-001 1.0000000e+000 1.0000000e+000  
3.0485442e-001 1.0000000e+000 1.0000000e+000



3.8613038e-001 1.0000000e+000 1.0000000e+000  
3.9077598e-001 1.0000000e+000 1.0000000e+000  
3.9612989e-001 1.0000000e+000 1.0000000e+000  
3.9672818e-001 1.0000000e+000 1.0000000e+000  
3.9724770e-001 1.0000000e+000 1.0000000e+000  
3.9823598e-001 1.0000000e+000 1.0000000e+000  
4.0033602e-001 1.0000000e+000 1.0000000e+000  
4.0223268e-001 1.0000000e+000 1.0000000e+000  
4.0249845e-001 1.0000000e+000 1.0000000e+000  
4.1005492e-001 1.0000000e+000 1.0000000e+000  
4.1182609e-001 1.0000000e+000 1.0000000e+000  
4.1225447e-001 1.0000000e+000 1.0000000e+000  
4.1454620e-001 1.0000000e+000 1.0000000e+000  
4.1648698e-001 1.0000000e+000 1.0000000e+000  
4.2121941e-001 1.0000000e+000 1.0000000e+000  
4.2354175e-001 1.0000000e+000 1.0000000e+000  
4.2661581e-001 1.0000000e+000 1.0000000e+000  
4.3357475e-001 1.0000000e+000 1.0000000e+000  
4.3589980e-001 1.0000000e+000 1.0000000e+000  
4.3807045e-001 1.0000000e+000 1.0000000e+000  
4.4284991e-001 1.0000000e+000 1.0000000e+000  
4.4452869e-001 1.0000000e+000 1.0000000e+000  
4.4966585e-001 1.0000000e+000 1.0000000e+000  
4.5142794e-001 1.0000000e+000 1.0000000e+000  
4.5169333e-001 1.0000000e+000 1.0000000e+000  
4.5914071e-001 1.0000000e+000 1.0000000e+000  
4.6398642e-001 1.0000000e+000 1.0000000e+000  
4.6411355e-001 1.0000000e+000 1.0000000e+000  
4.6870988e-001 1.0000000e+000 1.0000000e+000  
4.6941666e-001 1.0000000e+000 1.0000000e+000  
4.8460163e-001 1.0000000e+000 1.0000000e+000  
4.8581314e-001 1.0000000e+000 1.0000000e+000  
4.8706764e-001 1.0000000e+000 1.0000000e+000

|                |                |                |
|----------------|----------------|----------------|
| 4.8770022e-001 | 1.0000000e+000 | 1.0000000e+000 |
| 4.8791740e-001 | 1.0000000e+000 | 1.0000000e+000 |
| 5.1547702e-001 | 1.0000000e+000 | 1.0000000e+000 |
| 5.2509958e-001 | 1.0000000e+000 | 1.0000000e+000 |
| 5.2572967e-001 | 1.0000000e+000 | 1.0000000e+000 |
| 5.2824671e-001 | 1.0000000e+000 | 1.0000000e+000 |
| 5.3470225e-001 | 1.0000000e+000 | 1.0000000e+000 |
| 5.4075946e-001 | 1.0000000e+000 | 1.0000000e+000 |
| 5.4399826e-001 | 1.0000000e+000 | 1.0000000e+000 |
| 5.4747896e-001 | 1.0000000e+000 | 1.0000000e+000 |
| 5.5623141e-001 | 1.0000000e+000 | 1.0000000e+000 |
| 5.5739532e-001 | 1.0000000e+000 | 1.0000000e+000 |
| 5.6228871e-001 | 1.0000000e+000 | 1.0000000e+000 |
| 5.7643934e-001 | 1.0000000e+000 | 1.0000000e+000 |
| 5.8613723e-001 | 1.0000000e+000 | 1.0000000e+000 |
| 5.8834706e-001 | 1.0000000e+000 | 1.0000000e+000 |
| 5.8888192e-001 | 1.0000000e+000 | 1.0000000e+000 |
| 5.9028968e-001 | 1.0000000e+000 | 1.0000000e+000 |
| 5.9291785e-001 | 1.0000000e+000 | 1.0000000e+000 |
| 5.9929622e-001 | 1.0000000e+000 | 1.0000000e+000 |
| 6.0207386e-001 | 1.0000000e+000 | 1.0000000e+000 |
| 6.1127129e-001 | 1.0000000e+000 | 1.0000000e+000 |
| 6.1220310e-001 | 1.0000000e+000 | 1.0000000e+000 |
| 6.5064883e-001 | 1.0000000e+000 | 1.0000000e+000 |
| 6.7485216e-001 | 1.0000000e+000 | 1.0000000e+000 |
| 6.7972517e-001 | 1.0000000e+000 | 1.0000000e+000 |
| 6.8036715e-001 | 1.0000000e+000 | 1.0000000e+000 |
| 6.8573027e-001 | 1.0000000e+000 | 1.0000000e+000 |
| 6.8773092e-001 | 1.0000000e+000 | 1.0000000e+000 |
| 6.9256698e-001 | 1.0000000e+000 | 1.0000000e+000 |
| 7.0451627e-001 | 1.0000000e+000 | 1.0000000e+000 |
| 7.2606576e-001 | 1.0000000e+000 | 1.0000000e+000 |
| 7.3408011e-001 | 1.0000000e+000 | 1.0000000e+000 |

7.5533488e-001 1.0000000e+000 1.0000000e+000  
7.5644816e-001 1.0000000e+000 1.0000000e+000  
7.6221147e-001 1.0000000e+000 1.0000000e+000  
7.6372166e-001 1.0000000e+000 1.0000000e+000  
7.7379820e-001 1.0000000e+000 1.0000000e+000  
7.8462451e-001 1.0000000e+000 1.0000000e+000  
7.9644919e-001 1.0000000e+000 1.0000000e+000  
8.0292905e-001 1.0000000e+000 1.0000000e+000  
8.0885364e-001 1.0000000e+000 1.0000000e+000  
8.1062906e-001 1.0000000e+000 1.0000000e+000  
8.1277988e-001 1.0000000e+000 1.0000000e+000  
8.2545401e-001 1.0000000e+000 1.0000000e+000  
8.2829169e-001 1.0000000e+000 1.0000000e+000  
8.3945230e-001 1.0000000e+000 1.0000000e+000  
8.4511270e-001 1.0000000e+000 1.0000000e+000  
8.4735247e-001 1.0000000e+000 1.0000000e+000  
8.5416018e-001 1.0000000e+000 1.0000000e+000  
8.6050605e-001 1.0000000e+000 1.0000000e+000  
8.6183989e-001 1.0000000e+000 1.0000000e+000  
8.6283770e-001 1.0000000e+000 1.0000000e+000  
8.6845627e-001 1.0000000e+000 1.0000000e+000  
8.7506972e-001 1.0000000e+000 1.0000000e+000  
8.7567519e-001 1.0000000e+000 1.0000000e+000  
8.8512173e-001 1.0000000e+000 1.0000000e+000  
8.8650540e-001 1.0000000e+000 1.0000000e+000  
8.9052822e-001 1.0000000e+000 1.0000000e+000  
9.0150248e-001 1.0000000e+000 1.0000000e+000  
9.0703999e-001 1.0000000e+000 1.0000000e+000  
9.2775075e-001 1.0000000e+000 1.0000000e+000  
9.3102801e-001 1.0000000e+000 1.0000000e+000  
9.3794092e-001 1.0000000e+000 1.0000000e+000  
9.4651150e-001 1.0000000e+000 1.0000000e+000  
9.4697777e-001 1.0000000e+000 1.0000000e+000

|                |                |                |
|----------------|----------------|----------------|
| 9.5001212e-001 | 1.0000000e+000 | 1.0000000e+000 |
| 9.5650326e-001 | 1.0000000e+000 | 1.0000000e+000 |
| 9.5701679e-001 | 1.0000000e+000 | 1.0000000e+000 |
| 9.5731938e-001 | 1.0000000e+000 | 1.0000000e+000 |
| 9.7313292e-001 | 1.0000000e+000 | 1.0000000e+000 |
| 9.7322925e-001 | 1.0000000e+000 | 1.0000000e+000 |
| 9.7366322e-001 | 1.0000000e+000 | 1.0000000e+000 |
| 9.8044078e-001 | 1.0000000e+000 | 1.0000000e+000 |
| 9.8226791e-001 | 1.0000000e+000 | 1.0000000e+000 |
| 9.8470200e-001 | 1.0000000e+000 | 1.0000000e+000 |
| 9.9108468e-001 | 1.0000000e+000 | 1.0000000e+000 |
| 9.9326334e-001 | 1.0000000e+000 | 1.0000000e+000 |
| 9.9636030e-001 | 1.0000000e+000 | 1.0000000e+000 |
| 9.9663052e-001 | 1.0000000e+000 | 1.0000000e+000 |
